# Supplementary material for: Development of Solvent-Free Co-Ground Method to Produce Terbinafine Hydrochloride Cyclodextrin Binary Systems; Structural and In Vitro Characterizations
Source: Pharmaceutics. 2022 Mar 30;14(4):744. doi: 10.3390/pharmaceutics14040744 (PMC9025016; doi:10.3390/pharmaceutics14040744)
Supplement: Supplementary file 1 [file pharmaceutics-14-00744-s001.zip › pharmaceutics-1620961-supplementary.pdf]

Supplementary

# Development of Solvent-free Co-ground Method to Produce Terbinafine Hydrochloride Cyclodextrin Binary Systems; Structural and In Vitro Characterizations

Balázs Attila Kondoros, Orsolya Jójárt-Laczkovich, Ottó Berkesi, Piroska Szabó-Révész, Ildikó Csóka, Rita Ambrus and Zoltán Aigner

Table S1. contains the dissolution efficiency (DE, %) at 120 min and MDT values. DE of physical mixtures (PMs) is higher than pure drug, due to the solubilizing effect of dissolved CDs, however lower than ground products.

**Table S1.** Calculated dissolution efficiency (DE, %) at 120 min and MDT values of pure drug, PMs and co-ground products.

|                             | Products     | % DE 120 min | MDT   |
|-----------------------------|--------------|--------------|-------|
| Simulated intestinal medium | TER          | 0.90         | 18.88 |
|                             | TER:DIMEB_PM | 4.11         | 12.84 |
|                             | TER:HPBCD_PM | 1.27         | 12.12 |
|                             | TER:DIMEB    | 4.81         | 11.02 |
|                             | TER:HPBCD    | 1.70         | 28.86 |
| Simulated gastric medium    | TER          | 80.45        | 18.35 |
|                             | TER:DIMEB_PM | 74.91        | 9.13  |
|                             | TER:HPBCD_PM | 84.87        | 10.43 |
|                             | TER:DIMEB    | 91.54        | 12.54 |
|                             | TER:HPBCD    | 88.54        | 7.69  |

Table S2. shows the calculated apparent permeability coefficient ( $P_{app}$ ) and enhancement ratios (R). In case of DIMEB-products, co-ground products and PMs showed similar permeability. However, diffusion from HPBCD containing PMs decreased from intestinal medium, the diffused drug was undetectable under the measurement conditions. On the other hand, the drug diffused from gastric medium resulted in a higher concentration in the acceptor phase than the ground products.

**Table S2.** Calculated apparent permeability coefficient ( $P_{app}$ ) and enhancement ratios (R) of pure drug, physical mixtures (PM) and co-ground products.

|                             | Products     | $P_{app}$ | R     |
|-----------------------------|--------------|-----------|-------|
| Simulated intestinal medium | TER          | 1.41E-04  | -     |
|                             | TER:DIMEB_PM | 1.34E-04  | 0.950 |
|                             | TER:HPBCD_PM | -         | -     |
|                             | TER:DIMEB    | 1.30E-04  | 0.921 |
|                             | TER:HPBCD    | 1.12E-04  | 0.793 |
| Simulated gastric medium    | TER          | 7.72E-06  | -     |
|                             | TER:DIMEB_PM | 1.76E-06  | 2.280 |
|                             | TER:HPBCD_PM | 1.86E-06  | 2.422 |
|                             | TER:DIMEB    | 1.72E-04  | 2.232 |
|                             | TER:HPBCD    | 3.28E-05  | 0.425 |
